# Supplementary material for: Gold nanoparticle-coated apoferritin conductive nanowires
Source: Royal Society of Chemistry journal article supplement (doi:10.1039/d3ra03186a), 2023-01-01
Supplement: d3ra03186a1.pdf [file d3ra03186a1.pdf]

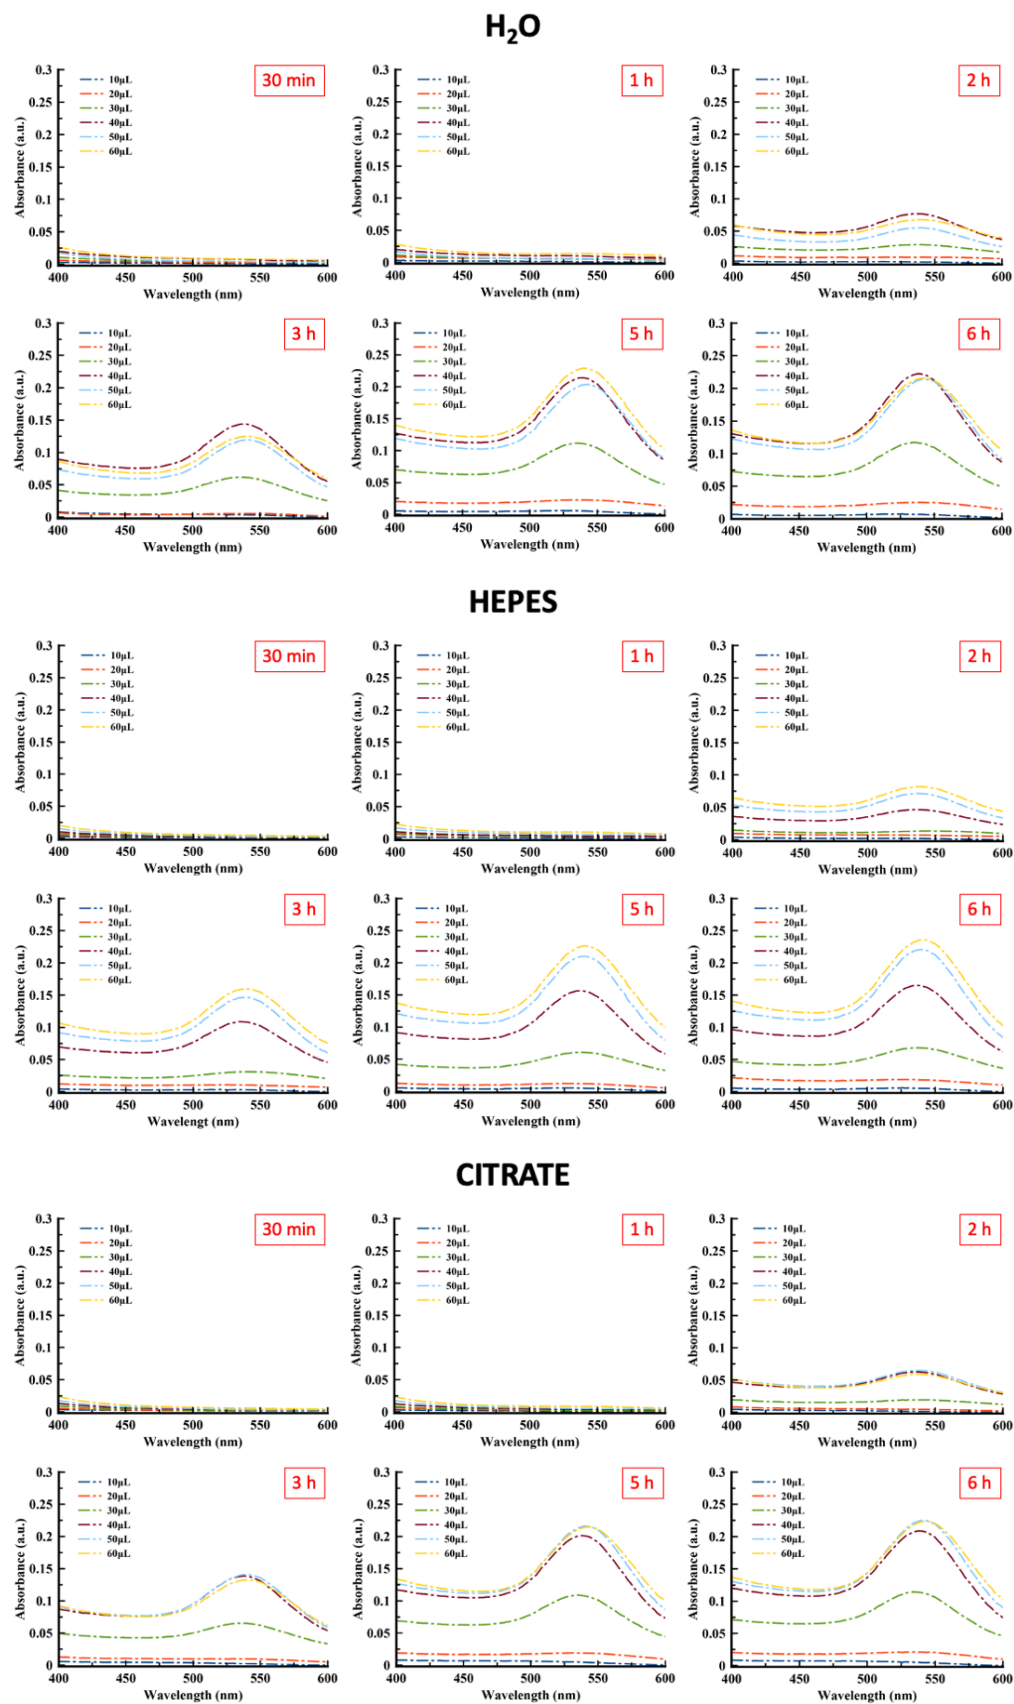

**Figure S1.** Kinetic formation study of AuAPO hybrid system at different incubation times and reaction media.

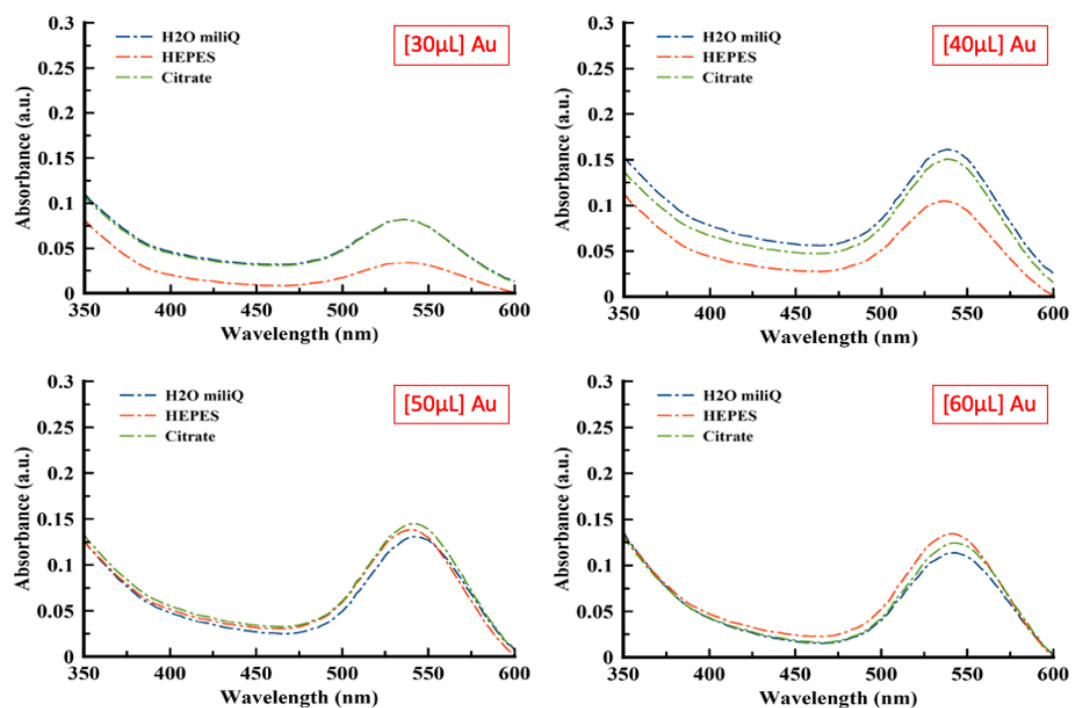

**Figure S2.** Kinetic formation study of AuAPO hybrid system at different  $\text{Au}^{3+}$  concentrations and reaction media.

| Peak  | Type | Position<br>BE (eV) | FWHM<br>(eV) | Raw Area<br>(cps eV) | RSF   | Atomic<br>Mass | Atomic<br>Conc % | Mass<br>Conc % |
|-------|------|---------------------|--------------|----------------------|-------|----------------|------------------|----------------|
| C 1s  | Reg  | 283.000             | 2.904        | 1067053.2            | 0.278 | 12.011         | 67.58            | 61.55          |
| O 1s  | Reg  | 530.000             | 3.265        | 854077.3             | 0.780 | 15.999         | 19.64            | 23.83          |
| N 1s  | Reg  | 403.000             | 4.362        | 334131.1             | 0.477 | 14.007         | 12.70            | 13.49          |
| Au 4f | Reg  | 86.000              | 6.446        | 28422.5              | 6.250 | 196.967        | 0.08             | 1.13           |

**Table S1.** XPS atomic composition and atomic ratios for the AuAPOC5 sample.

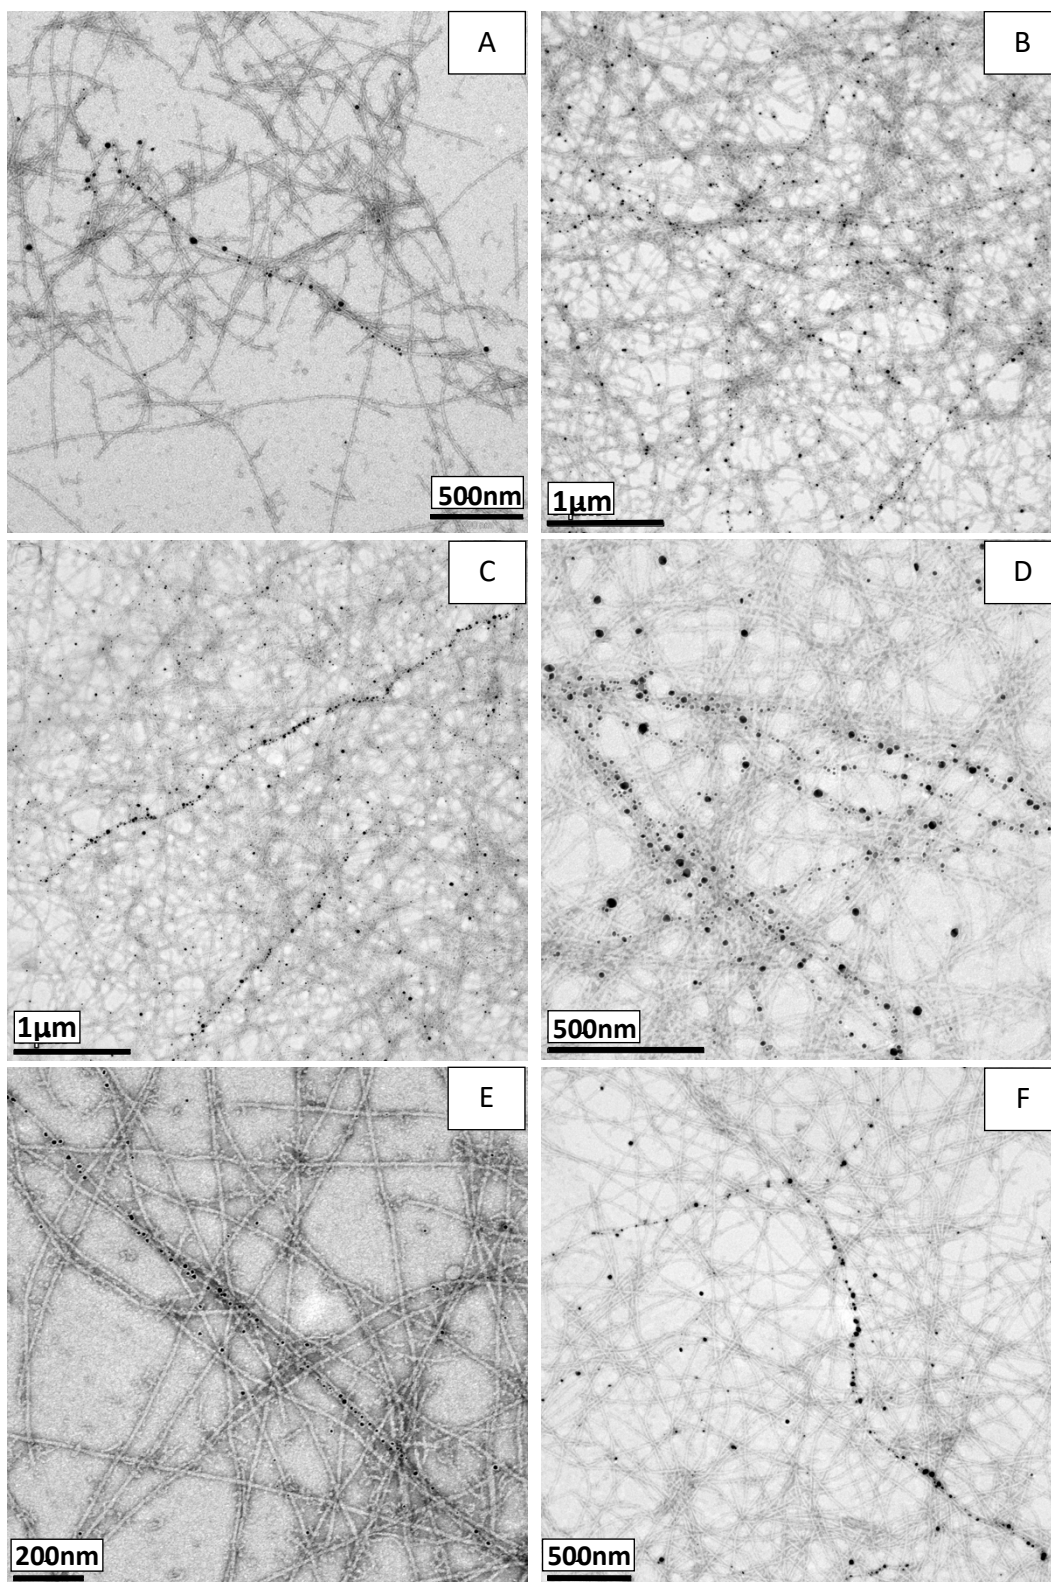

**Figure S3.** TEM images of AuAPO hybrid system. Panel A corresponds to AuAPOA3, B to AuAPOA5, C to AuAPB5, D to AuAPOB6, E to AuAPOC3, and F to AuAPOC6.

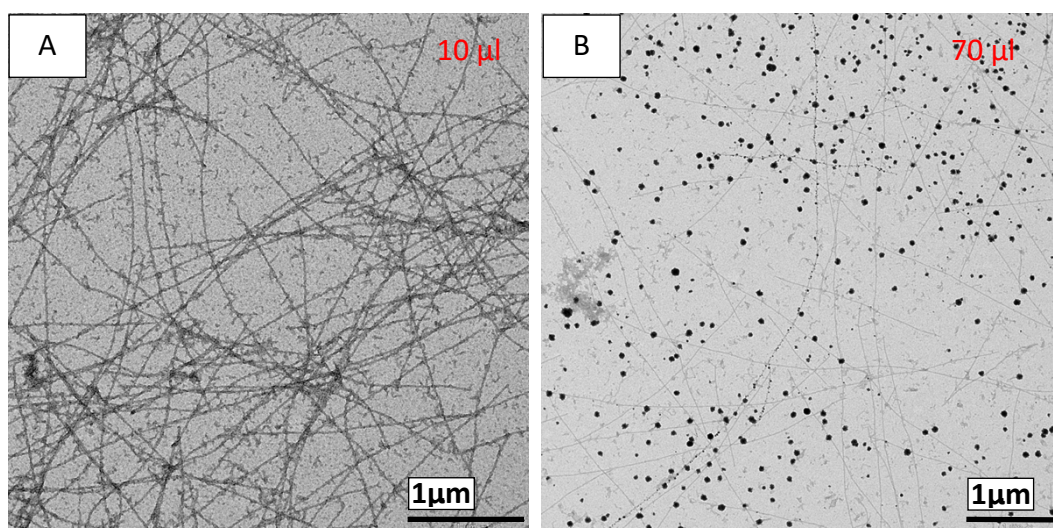

**Figure S4.** TEM study of AuAPO hybrid system. Influence of  $\text{Au}^{3+}$  added volume: Panel A corresponds to  $\text{Au}^{3+}$  added volumes of 10  $\mu\text{l}$  and Panel B to  $\text{Au}^{3+}$  added volumes of 70  $\mu\text{l}$  in milliQ-water.
